# Supplementary material for: In vitro activity of ceftazidime-avibactam against Enterobacterales and Pseudomonas aeruginosa isolates collected in Latin America as part of the ATLAS global surveillance program, 2017–2019
Source: PubMed Central journal article supplement — Braz J Infect Dis. 2021 Nov 10;25(6):101647. doi: 10.1016/j.bjid.2021.101647 (PMC9392196; doi:10.1016/j.bjid.2021.101647), 2021-11-10
Supplement: mmc1.pdf [file mmc1.pdf]

522 **SUPPLEMENTARY DATA**

523 **TABLE S1** Demographic information associated with the 8,416 isolates of Enterobacterales and  
 524 2,521 isolates of *P. aeruginosa* tested by the ATLAS global surveillance program from 2017 to  
 525 2019

|                                                          | Enterobacterales<br>(no. of isolates) | <i>P. aeruginosa</i><br>(no. of isolates) |
|----------------------------------------------------------|---------------------------------------|-------------------------------------------|
| <b>Specimen source</b>                                   |                                       |                                           |
| Intra-abdominal                                          | 1,335                                 | 239                                       |
| Urinary tract                                            | 2,418                                 | 359                                       |
| Skin and soft tissue                                     | 1,520                                 | 619                                       |
| Lower respiratory tract                                  | 1,297                                 | 946                                       |
| Bloodstream                                              | 1,842                                 | 356                                       |
| Other                                                    | 4                                     | 2                                         |
| <b>Country (number of participating medical centers)</b> |                                       |                                           |
| Argentina (4)                                            | 1,039                                 | 308                                       |
| Brazil (12)                                              | 1,646                                 | 425                                       |
| Chile (3)                                                | 805                                   | 257                                       |
| Colombia (6)                                             | 1,252                                 | 384                                       |
| Costa Rica (1)                                           | 185                                   | 55                                        |
| Dominican Republic (1)                                   | 193                                   | 64                                        |
| Guatemala (2)                                            | 364                                   | 149                                       |
| Mexico (7)                                               | 1,802                                 | 562                                       |
| Panama (2)                                               | 316                                   | 80                                        |
| Venezuela (3)                                            | 814                                   | 237                                       |
| <b>Year of isolation</b>                                 |                                       |                                           |
| 2017                                                     | 2,717                                 | 681                                       |
| 2018                                                     | 2,815                                 | 722                                       |
| 2019                                                     | 2,884                                 | 1,118                                     |

526
